# Supplementary material for: Dietary Intake of Fatty Acids, Total Cholesterol, and Stomach Cancer in a Chinese Population
Source: PubMed Central journal article supplement (PMC6723637; doi:10.3390/nu11081730), 2019-07-26

Supplemental Table 1. The crude odds ratios of main risk factors on stomach cancer (n=10,235).

| Variables                            | Cases(n=2216) | Controls (n=8019) | cOR (95%CI)              |
|--------------------------------------|---------------|-------------------|--------------------------|
| Gender                               |               |                   |                          |
| Male                                 | 1632 (73.7)   | 5767 (71.9)       | 1.09 (0.98, 1.21)        |
| Female                               | 584 (26.4)    | 2252 (28.1)       | 1.00                     |
| Age                                  |               |                   |                          |
| <50                                  | 237 (10.7)    | 884 (11.0)        | 1.00                     |
| 50-59                                | 473 (21.3)    | 1794 (22.4)       | 0.98 (0.83, 1.17)        |
| 60-69                                | 745 (33.6)    | 2565 (32.0)       | 1.08 (0.92, 1.28)        |
| ≥70                                  | 761 (34.3)    | 2776 (34.6)       | 1.02 (0.87, 1.21)        |
| Education                            |               |                   |                          |
| Illiterate                           | 1096 (49.6)   | 3831 (47.8)       | 1.00                     |
| Primary school                       | 773 (34.9)    | 2515 (31.4)       | 1.07 (0.97, 1.19)        |
| Middle school                        | 279 (12.6)    | 1320 (16.5)       | <b>0.74 (0.64, 0.85)</b> |
| High school or above                 | 62 (2.8)      | 335 (4.2)         | <b>0.65 (0.49, 0.86)</b> |
| Income 10 years ago (Yuan/year)      |               |                   |                          |
| <1000                                | 525 (23.7)    | 1710 (21.3)       | 1.00                     |
| 1000-1499                            | 437 (19.7)    | 1530 (19.1)       | 0.93 (0.81, 1.07)        |
| 1500-2499                            | 563 (25.4)    | 2074 (25.9)       | 0.88 (0.77, 1.01)        |
| ≥2500                                | 630 (28.4)    | 2572 (32.1)       | <b>0.80 (0.70, 0.91)</b> |
| Body mass index (kg/m <sup>2</sup> ) |               |                   |                          |
| <18.5                                | 327 (14.8)    | 454 (5.7)         | <b>2.35 (2.02, 2.75)</b> |
| 18.5-<24                             | 1480 (66.8)   | 4839 (60.3)       | 1.00                     |
| 24-<28                               | 315 (14.2)    | 2230 (27.8)       | <b>0.46 (0.40, 0.53)</b> |
| ≥28                                  | 70 (3.2)      | 453 (5.7)         | <b>0.51 (0.39, 0.65)</b> |
| Exercise ten years ago               |               |                   |                          |
| No                                   | 1364 (61.6)   | 4723 (58.9)       | 1.00                     |
| Yes                                  | 852 (38.5)    | 3296 (41.1)       | <b>0.90 (0.81, 0.99)</b> |
| Pack-years of tobacco smoking        |               |                   |                          |
| 0                                    | 923 (41.7)    | 4292 (53.5)       | 1.00                     |
| 1 to 19                              | 255 (11.5)    | 811 (10.1)        | <b>1.46 (1.25, 1.71)</b> |
| 20-39                                | 339 (15.3)    | 1133 (14.1)       | <b>1.39 (1.21, 1.60)</b> |
| ≥40                                  | 510 (23.0)    | 1241 (15.5)       | <b>1.91 (1.69, 2.17)</b> |
| Grams ethanol/week in the 1990's*    |               |                   |                          |
| Never                                | 1288 (58.1)   | 5054 (63.0)       | 1.00                     |
| Low-risk                             | 151 (6.8)     | 533 (6.7)         | 1.11 (0.92, 1.35)        |
| High-risk                            | 745 (33.6)    | 2279 (28.4)       | <b>1.28 (1.16, 1.42)</b> |
| Family history of stomach cancer     |               |                   |                          |
| No                                   | 2022 (91.2)   | 7644 (95.3)       | 1.00                     |
| Yes                                  | 194 (8.8)     | 375 (4.7)         | <b>1.96 (1.63, 2.34)</b> |
| H. Pylori infection                  |               |                   |                          |
| No                                   | 377 (17.1)    | 1918 (23.9)       | 1.00                     |
| Yes                                  | 1247 (56.3)   | 4748 (59.2)       | <b>1.34 (1.18, 1.52)</b> |

Notes: cOR: crude odds ratios;

\*: Low-risk drinking: men ( $\leq 25$  g ethanol /day) and women ( $\leq 15$  g ethanol /day); High-risk drinking: men ( $>25$  g ethanol /day) and women ( $>15$  g ethanol /day based on the 2016 Chinese Dietary Guide.

**Supplemental Table 2.** Adjusted odds ratios and 95% CIs for associations between dietary fatty acids, total cholesterol and stomach cancer in Jiangsu study stratified by proxy interview (Non-proxy =7,383, Proxy=1,049).

| Variables                | Cases/controls | Non-proxy (n=7,383)      |                          | Cases/controls | Proxy (n=1,049)          |                          |
|--------------------------|----------------|--------------------------|--------------------------|----------------|--------------------------|--------------------------|
|                          |                | aOR (95%CI) <sup>a</sup> | rOR (95%CI) <sup>a</sup> |                | aOR (95%CI) <sup>a</sup> | rOR (95%CI) <sup>a</sup> |
| Total fatty acid (g/day) |                |                          |                          |                |                          |                          |
| Q1 (<14.85)              | 230/1472       | 1.00                     | 1.00                     | 126/161        | 1.00                     | 1.00                     |
| Q2 (14.85-<24.75)        | 286/1527       | <b>1.32 (1.03, 1.71)</b> | 1.10 (0.87, 1.38)        | 145/106        | 1.12 (0.68, 1.84)        | 1.40 (0.80, 2.44)        |
| Q3 (24.75-<40.17)        | 408/1527       | <b>1.59 (1.22, 2.07)</b> | <b>1.29 (1.02, 1.63)</b> | 173/106        | 1.38 (0.82, 2.34)        | 1.32 (0.76, 2.28)        |
| Q4 (40.17+)              | 403/1530       | <b>1.46 (1.07, 1.99)</b> | 1.06 (0.83, 1.35)        | 129/103        | 1.34 (0.68, 2.65)        | 1.21 (0.67, 2.16)        |
| P value for trend        |                | <b>0.01</b>              | 0.44                     |                | 0.27                     | 0.7                      |
| Per 25g increase         |                | 1.06 (0.95, 1.18)        |                          |                | 1.03 (0.81, 1.32)        |                          |
| SFAs (g/day)             |                |                          |                          |                |                          |                          |
| Q1 (<4.35)               | 232/1480       | 1.00                     | 1.00                     | 129/153        | 1.00                     | 1.00                     |
| Q2 (4.35-<7.14)          | 294/1518       | <b>1.30 (1.01, 1.67)</b> | 1.08 (0.86, 1.37)        | 144/115        | 0.98 (0.60, 1.60)        | 1.33 (0.77, 2.28)        |
| Q3 (7.14-<11.56)         | 402/1535       | <b>1.45 (1.12, 1.89)</b> | <b>1.32 (1.04, 1.67)</b> | 164/98         | 1.38 (0.81, 2.33)        | 1.09 (0.63, 1.89)        |
| Q4 (11.56+)              | 399/1523       | <b>1.37 (1.00, 1.86)</b> | 1.15 (0.90, 1.47)        | 136/110        | 1.20 (0.63, 2.30)        | 1.21 (0.69, 2.15)        |
| P value for trend        |                | <b>0.046</b>             | 0.13                     |                | 0.33                     | 0.76                     |
| Per 7g increase          |                | 1.07 (0.96, 1.19)        |                          |                | 1.05 (0.84, 1.32)        |                          |
| MUFAs (g/day)            |                |                          |                          |                |                          |                          |
| Q1 (<5.57)               | 230/1488       | 1.00                     | 1.00                     | 126/145        | 1.00                     | 1.00                     |
| Q2 (5.57-<9.85)          | 285/1509       | 1.20 (0.93, 1.54)        | 1.08 (0.86, 1.36)        | 150/124        | 0.90 (0.56, 1.45)        | 1.10 (0.63, 1.92)        |
| Q3 (9.85-<16.65)         | 406/1539       | <b>1.55 (1.20, 2.01)</b> | <b>1.35 (1.07, 1.71)</b> | 166/94         | 1.16 (0.69, 1.95)        | 1.32 (0.76, 2.29)        |
| Q4 (16.65+)              | 406/1520       | <b>1.48 (1.10, 1.99)</b> | 1.09 (0.85, 1.40)        | 131/113        | 0.91 (0.48, 1.72)        | 1.05 (0.59, 1.87)        |
| P value for trend        |                | <b>0.003</b>             | 0.25                     |                | 0.93                     | 0.75                     |
| Per 10g increase         |                | 1.03 (0.94, 1.13)        |                          |                | 1.00 (0.82, 1.22)        |                          |
| PUFAs (g/day)            |                |                          |                          |                |                          |                          |
| Q1 (<4.28)               | 239/1463       | 1.00                     | 1.00                     | 126/170        | 1.00                     | 1.00                     |
| Q2 (4.28-<6.93)          | 301/1524       | 1.11 (0.86, 1.44)        | 1.11 (0.88, 1.39)        | 160/109        | 1.55 (0.95, 2.54)        | 1.12 (0.65, 1.94)        |
| Q3 (6.93-<10.80)         | 394/1532       | <b>1.34 (1.03, 1.75)</b> | 0.99 (0.78, 1.26)        | 166/101        | 1.63 (0.92, 2.88)        | 1.51 (0.86, 2.64)        |
| Q4 (10.80+)              | 393/1537       | 1.12 (0.81, 1.54)        | 1.11 (0.88, 1.40)        | 121/96         | 1.52 (0.73, 3.17)        | 1.10 (0.61, 1.98)        |
| P value for trend        |                | 0.34                     | 0.59                     |                | 0.21                     | 0.53                     |
| Per 6g increase          |                | 1.07 (0.96, 1.20)        |                          |                | 1.08 (0.85, 1.38)        |                          |

|                   |          |                          |                          |         |                          |                   |
|-------------------|----------|--------------------------|--------------------------|---------|--------------------------|-------------------|
| n-6 PUFAs (g/day) |          |                          |                          |         |                          |                   |
| Q1 (<3.76)        | 244/1458 | 1.00                     | 1.00                     | 128/175 | 1.00                     | 1.00              |
| Q2 (3.76-<5.97)   | 304/1529 | 1.15 (0.89, 1.48)        | 1.04 (0.83, 1.30)        | 166/104 | <b>1.67 (1.01, 2.76)</b> | 1.25 (0.72, 2.15) |
| Q3 (5.97-<9.14)   | 383/1530 | 1.25 (0.96, 1.64)        | 0.87 (0.68, 1.11)        | 155/103 | 1.45 (0.81, 2.57)        | 1.53 (0.88, 2.68) |
| Q4 (9.14+)        | 396/1539 | 1.13 (0.82, 1.56)        | 1.12 (0.89, 1.40)        | 124/94  | 1.61 (0.78, 3.36)        | 1.25 (0.69, 2.26) |
| P value for trend |          | 0.42                     | 0.56                     |         | 0.26                     | 0.37              |
| Per 5g increase   |          | 1.07 (0.96, 1.20)        |                          |         | 1.11 (0.87, 1.42)        |                   |
| LA (g/day)        |          |                          |                          |         |                          |                   |
| Q1 (<3.49)        | 251/1463 | 1.00                     | 1.00                     | 129/170 | 1.00                     | 1.00              |
| Q2 (3.49-<5.50)   | 310/1521 | 1.12 (0.87, 1.44)        | 1.03 (0.82, 1.29)        | 164/112 | 1.46 (0.89, 2.38)        | 1.16 (0.67, 1.99) |
| Q3 (5.50-<8.35)   | 369/1532 | 1.09 (0.83, 1.43)        | 0.88 (0.70, 1.12)        | 153/101 | 1.56 (0.87, 2.80)        | 1.29 (0.73, 2.28) |
| Q4 (8.35+)        | 397/1540 | 1.08 (0.79, 1.49)        | 1.13 (0.90, 1.42)        | 127/93  | 1.58 (0.76, 3.30)        | 1.23 (0.67, 2.23) |
| P value for trend |          | 0.72                     | 0.47                     |         | 0.2                      | 0.47              |
| Per 5g increase   |          | 1.10 (0.97, 1.24)        |                          |         | 1.14 (0.87, 1.49)        |                   |
| AA (g/day)        |          |                          |                          |         |                          |                   |
| Q1 (<0.18)        | 253/1496 | 1.00                     | 1.00                     | 141/137 | 1.00                     | 1.00              |
| Q2 (0.18-<0.38)   | 292/1502 | 1.13 (0.88, 1.44)        | 1.03 (0.81, 1.30)        | 146/131 | 0.87 (0.55, 1.39)        | 1.05 (0.61, 1.82) |
| Q3 (0.38-<0.78)   | 393/1536 | <b>1.34 (1.04, 1.71)</b> | <b>1.27 (1.00, 1.62)</b> | 160/97  | 0.91 (0.55, 1.50)        | 0.86 (0.50, 1.50) |
| Q4 (0.78+)        | 389/1522 | 1.16 (0.88, 1.53)        | 0.95 (0.75, 1.21)        | 126/111 | 1.00 (0.57, 1.75)        | 1.00 (0.57, 1.75) |
| P value for trend |          | 0.19                     | 0.94                     |         | 0.98                     | 0.78              |
| Per 1g increase   |          | 0.95 (0.82, 1.10)        |                          |         | 0.96 (0.72, 1.27)        |                   |
| n-3 PUFAs (g/day) |          |                          |                          |         |                          |                   |
| Q1 (<0.54)        | 241/1473 | 1.00                     | 1.00                     | 137/160 | 1.00                     | 1.00              |
| Q2 (0.54-<0.96)   | 276/1520 | 1.09 (0.85, 1.41)        | 1.11 (0.88, 1.40)        | 141/113 | 0.97 (0.60, 1.58)        | 1.14 (0.67, 1.93) |
| Q3 (0.96-<1.70)   | 410/1533 | <b>1.43 (1.10, 1.85)</b> | 1.21 (0.95, 1.53)        | 185/100 | 1.37 (0.81, 2.32)        | 1.31 (0.77, 2.24) |
| Q4 (1.70+)        | 400/1530 | 1.20 (0.89, 1.62)        | 1.05 (0.83, 1.33)        | 110/103 | 0.86 (0.44, 1.69)        | 1.08 (0.61, 1.93) |
| P value for trend |          | 0.1                      | 0.61                     |         | 0.83                     | 0.67              |
| Per 1g increase   |          | 1.02 (0.93, 1.12)        |                          |         | 0.99 (0.81, 1.20)        |                   |
| ALA (g/day)       |          |                          |                          |         |                          |                   |
| Q1 (<0.52)        | 247/1474 | 1.00                     | 1.00                     | 133/159 | 1.00                     | 1.00              |
| Q2 (0.52-<0.93)   | 270/1523 | 1.04 (0.81, 1.35)        | 1.08 (0.86, 1.37)        | 150/110 | 1.03 (0.63, 1.68)        | 1.18 (0.69, 2.00) |
| Q3 (0.93-<1.64)   | 411/1533 | <b>1.40 (1.09, 1.81)</b> | 1.22 (0.97, 1.55)        | 178/100 | 1.35 (0.80, 2.27)        | 1.36 (0.79, 2.33) |

|                   |          |                          |                   |         |                          |                   |
|-------------------|----------|--------------------------|-------------------|---------|--------------------------|-------------------|
| Q4 (1.64+)        | 399/1526 | 1.17 (0.87, 1.57)        | 1.01 (0.80, 1.28) | 112/107 | 0.83 (0.43, 1.61)        | 1.13 (0.64, 2.00) |
| P value for trend |          | 0.12                     | 0.76              |         | 0.95                     | 0.58              |
| Per 1g increase   |          | 1.02 (0.92, 1.12)        |                   |         | 0.99 (0.81, 1.21)        |                   |
| EPA (mg/day)      |          |                          |                   |         |                          |                   |
| Q1 (<4.30)        | 253/1449 | 1.00                     | 1.00              | 145/184 | 1.00                     | 1.00              |
| Q2 (4.30-<10.47)  | 332/1523 | 1.10 (0.86, 1.41)        | 0.93 (0.73, 1.17) | 171/110 | <b>1.98 (1.26, 3.12)</b> | 1.01 (0.61, 1.68) |
| Q3 (10.47-<21.77) | 327/1534 | 1.09 (0.84, 1.42)        | 0.99 (0.77, 1.27) | 123/99  | 1.31 (0.78, 2.21)        | 0.87 (0.51, 1.50) |
| Q4 (21.77+)       | 415/1550 | 1.18 (0.89, 1.56)        | 1.13 (0.89, 1.42) | 134/83  | 1.51 (0.85, 2.66)        | 1.22 (0.71, 2.11) |
| P value for trend |          | 0.31                     | 0.23              |         | 0.24                     | 0.59              |
| Per 20mg increase |          | 1.01 (0.98, 1.05)        |                   |         | 0.98 (0.85, 1.12)        |                   |
| DHA (mg/day)      |          |                          |                   |         |                          |                   |
| Q1 (<2.52)        | 248/1435 | 1.00                     | 1.00              | 175/198 | 1.00                     | 1.00              |
| Q2 (2.52-<9.97)   | 307/1528 | 1.04 (0.80, 1.34)        | 0.87 (0.68, 1.11) | 141/105 | <b>2.01 (1.25, 3.23)</b> | 1.05 (0.63, 1.76) |
| Q3 (9.97-<24.49)  | 318/1547 | 0.97 (0.73, 1.28)        | 0.87 (0.67, 1.12) | 125/86  | <b>1.86 (1.08, 3.20)</b> | 0.89 (0.51, 1.56) |
| Q4 (24.49+)       | 454/1546 | 1.28 (0.95, 1.71)        | 1.12 (0.89, 1.42) | 132/87  | <b>1.88 (1.05, 3.35)</b> | 1.45 (0.83, 2.55) |
| P value for trend |          | 0.08                     | 0.22              |         | <b>0.03</b>              | 0.28              |
| Per 20mg increase |          | <b>1.06 (1.02, 1.10)</b> |                   |         | 1.01 (0.88, 1.15)        |                   |
| n-3/n-6 PUFAs     |          |                          |                   |         |                          |                   |
| Q1 (<0.13)        | 262/1498 | 1.00                     | 1.00              | 144/135 | 1.00                     | 1.00              |
| Q2 (0.13-<0.16)   | 309/1528 | 0.92 (0.73, 1.18)        | 0.88 (0.70, 1.11) | 140/105 | 1.24 (0.76, 2.03)        | 0.76 (0.45, 1.30) |
| Q3 (0.16-<0.20)   | 380/1535 | <b>1.30 (1.03, 1.63)</b> | 1.12 (0.89, 1.41) | 155/98  | 1.09 (0.67, 1.78)        | 0.81 (0.48, 1.38) |
| Q4 (0.20+)        | 376/1495 | 1.14 (0.89, 1.46)        | 1.11 (0.88, 1.38) | 134/138 | 0.73 (0.45, 1.19)        | 0.64 (0.38, 1.06) |
| P value for trend |          | 0.06                     | 0.15              |         | 0.19                     | 0.12              |
| Per 0.1 increase  |          | 1.11 (0.96, 1.30)        |                   |         | 0.95 (0.70, 1.29)        |                   |
| Total fat (g/day) |          |                          |                   |         |                          |                   |
| Q1 (<18.84)       | 239/1487 | 1.00                     | 1.00              | 116/146 | 1.00                     | 1.00              |
| Q2 (18.84-<31.07) | 314/1510 | <b>1.29 (1.01, 1.65)</b> | 1.14 (0.91, 1.43) | 149/123 | 1.03 (0.64, 1.68)        | 0.95 (0.54, 1.67) |
| Q3 (31.07-<48.98) | 389/1533 | <b>1.41 (1.09, 1.82)</b> | 1.14 (0.89, 1.44) | 168/100 | 1.15 (0.66, 1.99)        | 1.22 (0.69, 2.15) |
| Q4 (48.98+)       | 385/1526 | 1.26 (0.93, 1.71)        | 1.02 (0.80, 1.31) | 140/107 | 1.15 (0.58, 2.27)        | 0.97 (0.52, 1.79) |
| P value for trend |          | 0.12                     | 0.89              |         | 0.62                     | 0.82              |
| Per 30g increase  |          | 1.03 (0.92, 1.16)        |                   |         | 0.95 (0.74, 1.23)        |                   |
| Total cholesterol |          |                          |                   |         |                          |                   |

(mg/day)

|                     |          |                          |                          |         |                          |                          |
|---------------------|----------|--------------------------|--------------------------|---------|--------------------------|--------------------------|
| Q1 (<107.24)        | 300/1506 | 1.00                     | 1.00                     | 107/127 | 1.00                     | 1.00                     |
| Q2 (107.24-<207.21) | 318/1503 | 1.06 (0.84, 1.33)        | 1.05 (0.85, 1.31)        | 111/130 | 0.87 (0.53, 1.42)        | <b>2.30 (1.32, 3.99)</b> |
| Q3 (207.21-<352.09) | 344/1534 | 1.20 (0.95, 1.51)        | <b>1.28 (1.01, 1.61)</b> | 154/99  | <b>1.76 (1.05, 2.93)</b> | <b>2.30 (1.34, 3.96)</b> |
| Q4 (352.09+)        | 365/1513 | <b>1.52 (1.17, 1.96)</b> | <b>1.46 (1.15, 1.86)</b> | 201/120 | <b>1.89 (1.08, 3.30)</b> | <b>2.37 (1.36, 4.16)</b> |
| P value for trend   |          | <b>0.001</b>             | <b>0.001</b>             |         | <b>0.005</b>             | <b>0.007</b>             |
| Per 250mg increase  |          | <b>1.13 (1.04, 1.22)</b> |                          |         | <b>1.26 (1.02, 1.55)</b> |                          |

Notes: aOR: adjusted odds ratios; rOR: adjusted odds ratios with residual methods; SFAs: Saturated fatty acids; MUFAs: Monounsaturated fatty acids; PUFAs: Polyunsaturated fatty acids; n-6 PUFAs: including LA and AA; LA: Linoleic acid; AA: Arachidonic acid; n-3 PUFAs: including ALA, EPA and DHA; ALA:  $\alpha$ -linolenic acid; EPA: Eicosapentaenoic acid; DHA: Docosahexaenoic acid.

<sup>a</sup>: Adjusted for study area, age, gender, education level, income, smoking, drinking, family history of stomach cancer, H. pylori infection, body mass index, exercise ten years ago, dietary sodium intake and total energy intake.

**Supplemental Table 3.** The associations between dietary fatty acids, total cholesterol and stomach cancer excluding individuals with reported total energy intake in the upper and lower 2.5% (cases=1,907, controls=6,598).

| Variables                | Cases/Controls | aOR (95%CI) <sup>a</sup> | rOR (95%CI) <sup>a</sup> |
|--------------------------|----------------|--------------------------|--------------------------|
| Total fatty acid (g/day) |                |                          |                          |
| Q1                       | 359/1649       | 1.00                     | 1.00                     |
| Q2                       | 428/1650       | 1.16 (0.93, 1.43)        | 1.19 (0.97, 1.45)        |
| Q3                       | 589/1650       | <b>1.52 (1.22, 1.90)</b> | <b>1.33 (1.08, 1.63)</b> |
| Q4                       | 531/1649       | <b>1.34 (1.03, 1.75)</b> | 1.19 (0.96, 1.47)        |
| <i>P</i> for trend       |                | <b>0.006</b>             | 0.075                    |
| SFAs (g/day)             |                |                          |                          |
| Q1                       | 358/1649       | 1.00                     | 1.00                     |
| Q2                       | 439/1650       | <b>1.24 (1.00, 1.54)</b> | <b>1.25 (1.02, 1.53)</b> |
| Q3                       | 572/1650       | <b>1.51 (1.20, 1.88)</b> | <b>1.35 (1.10, 1.66)</b> |
| Q4                       | 538/1649       | <b>1.46 (1.12, 1.89)</b> | <b>1.27 (1.03, 1.57)</b> |
| <i>P</i> for trend       |                | <b>0.002</b>             | <b>0.024</b>             |
| MUFAs (g/day)            |                |                          |                          |
| Q1                       | 361/1650       | 1.00                     | 1.00                     |
| Q2                       | 435/1649       | 1.23 (0.99, 1.52)        | 1.21 (0.99, 1.48)        |
| Q3                       | 574/1649       | <b>1.49 (1.20, 1.85)</b> | <b>1.43 (1.16, 1.75)</b> |
| Q4                       | 537/1650       | <b>1.44 (1.11, 1.85)</b> | 1.21 (0.97, 1.49)        |
| <i>P</i> for trend       |                | <b>0.002</b>             | <b>0.044</b>             |
| PUFAs (g/day)            |                |                          |                          |
| Q1                       | 375/1650       | 1.00                     | 1.00                     |
| Q2                       | 450/1649       | 1.12 (0.90, 1.39)        | 1.18 (0.96, 1.44)        |
| Q3                       | 557/1649       | <b>1.40 (1.11, 1.76)</b> | 1.21 (0.99, 1.49)        |
| Q4                       | 525/1650       | 1.17 (0.89, 1.53)        | 1.18 (0.96, 1.45)        |
| <i>P</i> for trend       |                | 0.13                     | 0.14                     |
| n-6 PUFAs (g/day)        |                |                          |                          |
| Q1                       | 377/1650       | 1.00                     | 1.00                     |
| Q2                       | 473/1649       | 1.20 (0.97, 1.49)        | 1.18 (0.97, 1.44)        |
| Q3                       | 535/1650       | <b>1.31 (1.04, 1.66)</b> | 1.10 (0.90, 1.36)        |
| Q4                       | 522/1649       | 1.13 (0.86, 1.49)        | 1.16 (0.95, 1.42)        |
| <i>P</i> for trend       |                | 0.35                     | 0.27                     |
| LA (g/day)               |                |                          |                          |
| Q1                       | 380/1650       | 1.00                     | 1.00                     |
| Q2                       | 478/1649       | 1.21 (0.98, 1.50)        | 1.17 (0.96, 1.43)        |
| Q3                       | 522/1649       | 1.25 (0.99, 1.58)        | 1.08 (0.88, 1.33)        |
| Q4                       | 527/1650       | 1.13 (0.86, 1.49)        | 1.17 (0.96, 1.43)        |
| <i>P</i> for trend       |                | 0.45                     | 0.24                     |
| AA (g/day)               |                |                          |                          |
| Q1                       | 394/1649       | 1.00                     | 1.00                     |
| Q2                       | 441/1650       | 1.12 (0.91, 1.37)        | 1.15 (0.94, 1.40)        |
| Q3                       | 551/1649       | <b>1.26 (1.02, 1.55)</b> | <b>1.27 (1.03, 1.56)</b> |
| Q4                       | 521/1650       | 1.22 (0.97, 1.54)        | 1.11 (0.90, 1.36)        |
| <i>P</i> for trend       |                | 0.06                     | 0.27                     |
| n-3 PUFAs (g/day)        |                |                          |                          |
| Q1                       | 375/1650       | 1.00                     | 1.00                     |
| Q2                       | 423/1649       | 1.15 (0.93, 1.43)        | 1.13 (0.93, 1.38)        |

|                            |          |                          |                          |
|----------------------------|----------|--------------------------|--------------------------|
| Q3                         | 593/1650 | <b>1.47 (1.18, 1.83)</b> | <b>1.27 (1.04, 1.56)</b> |
| Q4                         | 516/1649 | 1.25 (0.96, 1.61)        | 1.09 (0.89, 1.34)        |
| <i>P</i> for trend         |          | <b>0.03</b>              | 0.3                      |
| ALA (g/day)                |          |                          |                          |
| Q1                         | 374/1649 | 1.00                     | 1.00                     |
| Q2                         | 429/1650 | 1.15 (0.93, 1.42)        | 1.16 (0.95, 1.42)        |
| Q3                         | 586/1649 | <b>1.47 (1.18, 1.83)</b> | <b>1.29 (1.05, 1.58)</b> |
| Q4                         | 518/1650 | 1.24 (0.96, 1.60)        | 1.13 (0.92, 1.38)        |
| <i>P</i> for trend         |          | <b>0.04</b>              | 0.21                     |
| EPA (mg/day)               |          |                          |                          |
| Q1                         | 401/1650 | 1.00                     | 1.00                     |
| Q2                         | 503/1649 | 1.21 (0.99, 1.48)        | 0.94 (0.77, 1.15)        |
| Q3                         | 453/1650 | 1.09 (0.87, 1.35)        | 0.97 (0.79, 1.20)        |
| Q4                         | 550/1649 | 1.19 (0.94, 1.51)        | 1.08 (0.88, 1.32)        |
| <i>P</i> for trend         |          | 0.35                     | 0.42                     |
| DHA (mg/day)               |          |                          |                          |
| Q1                         | 431/1646 | 1.00                     | 1.00                     |
| Q2                         | 447/1653 | 1.11 (0.90, 1.37)        | <b>0.81 (0.66, 0.99)</b> |
| Q3                         | 446/1649 | 1.03 (0.82, 1.30)        | <b>0.80 (0.64, 0.99)</b> |
| Q4                         | 583/1650 | <b>1.33 (1.04, 1.69)</b> | 1.10 (0.90, 1.35)        |
| <i>P</i> for trend         |          | <b>0.04</b>              | 0.23                     |
| n-3/n-6 PUFAs              |          |                          |                          |
| Q1                         | 413/1649 | 1.00                     | 1.00                     |
| Q2                         | 450/1650 | 1.00 (0.81, 1.22)        | 0.94 (0.77, 1.14)        |
| Q3                         | 535/1650 | <b>1.28 (1.05, 1.55)</b> | 1.21 (0.99, 1.48)        |
| Q4                         | 509/1649 | 1.14 (0.93, 1.39)        | 1.10 (0.90, 1.33)        |
| <i>P</i> for trend         |          | 0.05                     | 0.1                      |
| Total fat (g/day)          |          |                          |                          |
| Q1                         | 359/1649 | 1.00                     | 1.00                     |
| Q2                         | 462/1650 | <b>1.31 (1.06, 1.61)</b> | <b>1.23 (1.01, 1.50)</b> |
| Q3                         | 560/1649 | <b>1.43 (1.14, 1.78)</b> | <b>1.27 (1.03, 1.56)</b> |
| Q4                         | 526/1650 | <b>1.32 (1.01, 1.71)</b> | 1.12 (0.90, 1.40)        |
| <i>P</i> for trend         |          | <b>0.03</b>              | 0.32                     |
| Total cholesterol (mg/day) |          |                          |                          |
| Q1                         | 408/1649 | 1.00                     | 1.00                     |
| Q2                         | 436/1650 | 1.05 (0.86, 1.28)        | 1.16 (0.95, 1.40)        |
| Q3                         | 500/1650 | <b>1.32 (1.08, 1.61)</b> | <b>1.39 (1.14, 1.70)</b> |
| Q4                         | 563/1649 | <b>1.52 (1.22, 1.90)</b> | <b>1.51 (1.23, 1.87)</b> |
| <i>P</i> for trend         |          | <b>&lt;0.001</b>         | <b>&lt;0.001</b>         |

Notes: aOR: adjusted odds ratios; rOR: adjusted odds ratios with residual methods; SFAs: Saturated fatty acids; MUFAs: Monounsaturated fatty acids; PUFAs: Polyunsaturated fatty acids; n-6 PUFAs: including LA and AA; LA: Linoleic acid; AA: Arachidonic acid; n-3 PUFAs: including ALA, EPA and DHA; ALA:  $\alpha$ -linolenic acid; EPA: Eicosapentaenoic acid; DHA: Docosahexaenoic acid.

<sup>a</sup>: Adjusted for study area, age (continuous), gender (male/female), education level (illiterate, primary school, middle school, high school or above), income 10 years ago (<1000, 1000-1499, 1500-2499,  $\geq$ 2500), smoking (continuous, pack-years), drinking (continuous, g ethanol/day), family history of stomach cancer (yes/no), *H. pylori* infection (positive/negative), BMI (<18.5, 18.5-24, 24-28,  $\geq$ 28), exercise 10 years ago (yes/no), dietary sodium intake (quartile) and total energy intake (continuous, Kcal/day).



**Supplemental Table 4.** Adjusted odds ratios of stomach cancer for daily intakes of fatty acids and total cholesterol using multiple imputations and semi-Bayes shrinkage methods.

| <b>Variables</b>         | <b>miOR (95%CI)<sup>a</sup></b> | <b>sbOR(95%CI)<sup>a</sup></b> |
|--------------------------|---------------------------------|--------------------------------|
| Total fatty acid (g/day) |                                 |                                |
| Q1 (<14.85)              | 1.00                            | 1.00                           |
| Q2 (14.85-<24.75)        | 0.95 (0.86, 1.05)               | <b>1.24 (1.01, 1.52)</b>       |
| Q3 (24.75-<40.17)        | <b>1.18 (1.08, 1.30)</b>        | <b>1.51 (1.22, 1.87)</b>       |
| Q4 (40.17+)              | 1.12 (1.00, 1.27)               | <b>1.37 (1.06, 1.76)</b>       |
| <i>P</i> for trend       | <b>&lt;0.001</b>                |                                |
| SFAs (g/day)             |                                 |                                |
| Q1 (<4.35)               | 1.00                            | 1.00                           |
| Q2 (4.35-<7.14)          | 0.95 (0.86, 1.04)               | 1.23 (1.00, 1.51)              |
| Q3 (7.14-<11.56)         | <b>1.16 (1.06, 1.26)</b>        | <b>1.43 (1.16, 1.76)</b>       |
| Q4 (11.56+)              | 1.11 (0.99, 1.24)               | <b>1.36 (1.06, 1.74)</b>       |
| <i>P</i> for trend       | <b>&lt;0.001</b>                |                                |
| MUFAs (g/day)            |                                 |                                |
| Q1 (<5.57)               | 1.00                            | 1.00                           |
| Q2 (5.57-<9.85)          | 0.95 (0.86, 1.04)               | 1.16 (0.95, 1.43)              |
| Q3 (9.85-<16.65)         | <b>1.20 (1.10, 1.31)</b>        | <b>1.45 (1.18, 1.78)</b>       |
| Q4 (16.65+)              | 1.10 (0.99, 1.23)               | <b>1.35 (1.06, 1.72)</b>       |
| <i>P</i> for trend       | <b>&lt;0.001</b>                |                                |
| PUFAs (g/day)            |                                 |                                |
| Q1 (<4.28)               | 1.00                            | 1.00                           |
| Q2 (4.28-<6.93)          | 1.00 (0.90, 1.10)               | 1.13 (0.92, 1.39)              |
| Q3 (6.93-<10.80)         | <b>1.14 (1.04, 1.26)</b>        | <b>1.40 (1.13, 1.74)</b>       |
| Q4 (10.80+)              | 1.03 (0.92, 1.16)               | 1.08 (0.83, 1.41)              |
| <i>P</i> for trend       | <b>0.03</b>                     |                                |
| Linoleic acid (g/day)    |                                 |                                |
| Q1 (<3.49)               | 1.00                            | 1.00                           |
| Q2 (3.49-<5.50)          | 1.02 (0.93, 1.12)               | 1.20 (0.98, 1.47)              |
| Q3 (5.50-<8.35)          | 1.06 (0.97, 1.17)               | 1.22 (0.98, 1.52)              |
| Q4 (8.35+)               | 1.03 (0.91, 1.16)               | 1.13 (0.87, 1.46)              |
| <i>P</i> for trend       | 0.22                            |                                |
| AA (g/day)               |                                 |                                |
| Q1 (<0.18)               | 1.00                            | 1.00                           |
| Q2 (0.18-<0.38)          | 0.97 (0.87, 1.07)               | 1.09 (0.89, 1.33)              |
| Q3 (0.38-<0.78)          | <b>1.14 (1.04, 1.25)</b>        | <b>1.22 (1.00, 1.49)</b>       |

|                    |                          |                          |
|--------------------|--------------------------|--------------------------|
| Q4 (0.78+)         | 1.01 (0.91, 1.13)        | 1.13 (0.90, 1.42)        |
| <i>P</i> for trend | 0.08                     |                          |
| n-6 PUFAs (g/day)  |                          |                          |
| Q1 (<3.76)         | 1.00                     | 1.00                     |
| Q2 (3.76-<5.97)    | 1.01 (0.92, 1.11)        | 1.17 (0.95, 1.43)        |
| Q3 (5.97-<9.14)    | 1.10 (1.00, 1.20)        | <b>1.31 (1.05, 1.63)</b> |
| Q4 (9.14+)         | 1.02 (0.90, 1.16)        | 1.12 (0.86, 1.45)        |
| <i>P</i> for trend | 0.15                     |                          |
| ALA (g/day)        |                          |                          |
| Q1 (<0.52)         | 1.00                     | 1.00                     |
| Q2 (0.52-<0.93)    | 0.93 (0.85, 1.03)        | 1.05 (0.86, 1.29)        |
| Q3 (0.93-<1.64)    | <b>1.23 (1.12, 1.34)</b> | <b>1.40 (1.13, 1.72)</b> |
| Q4 (1.64+)         | 1.00 (0.89, 1.11)        | 1.10 (0.86, 1.40)        |
| <i>P</i> for trend | <b>0.02</b>              |                          |
| EPA (mg/day)       |                          |                          |
| Q1 (<4.30)         | 1.00                     | 1.00                     |
| Q2 (4.30-<10.47)   | 1.04 (0.95, 1.14)        | 1.20 (0.99, 1.46)        |
| Q3 (10.47-<21.77)  | 0.98 (0.89, 1.07)        | 1.07 (0.87, 1.32)        |
| Q4 (21.77+)        | <b>1.12 (1.01, 1.24)</b> | 1.15 (0.92, 1.44)        |
| <i>P</i> for trend | <b>0.02</b>              |                          |
| DHA (mg/day)       |                          |                          |
| Q1 (<2.52)         | 1.00                     | 1.00                     |
| Q2 (2.52-<9.97)    | 0.92 (0.84, 1.01)        | 1.10 (0.90, 1.34)        |
| Q3 (9.97-<24.49)   | 0.99 (0.90, 1.08)        | 0.99 (0.80, 1.24)        |
| Q4 (24.49+)        | <b>1.23 (1.11, 1.37)</b> | <b>1.30 (1.03, 1.65)</b> |
| <i>P</i> for trend | <b>&lt;0.001</b>         |                          |
| n-3 PUFAs (g/day)  |                          |                          |
| Q1 (<0.54)         | 1.00                     | 1.00                     |
| Q2 (0.54-<0.96)    | 0.92 (0.84, 1.02)        | 1.04 (0.85, 1.28)        |
| Q3 (0.96-<1.70)    | <b>1.24 (1.13, 1.35)</b> | <b>1.39 (1.13, 1.72)</b> |
| Q4 (1.70+)         | 1.00 (0.89, 1.13)        | 1.10 (0.86, 1.40)        |
| <i>P</i> for trend | <b>0.01</b>              |                          |
| n-3/n-6 PUFAs      |                          |                          |
| Q1 (<0.13)         | 1.00                     | 1.00                     |
| Q2 (0.13-<0.16)    | 0.97 (0.89, 1.07)        | 0.97 (0.80, 1.18)        |
| Q3 (0.16-<0.20)    | <b>1.11 (1.01, 1.21)</b> | <b>1.24 (1.02, 1.49)</b> |

|                            |                          |                          |
|----------------------------|--------------------------|--------------------------|
| Q4 (0.20+)                 | 1.03 (0.94, 1.14)        | 1.08 (0.88, 1.31)        |
| <i>P</i> for trend         | 0.054                    |                          |
| Total fat (g/day)          |                          |                          |
| Q1 (<18.84)                | 1.00                     | 1.00                     |
| Q2 (18.84-<31.07)          | 1.01 (0.92, 1.11)        | <b>1.28 (1.05, 1.56)</b> |
| Q3 (31.07-<48.98)          | <b>1.14 (1.04, 1.25)</b> | <b>1.38 (1.12, 1.70)</b> |
| Q4 (48.98+)                | 1.05 (0.94, 1.18)        | 1.25 (0.98, 1.61)        |
| <i>P</i> for trend         | <b>0.007</b>             |                          |
| Total cholesterol (mg/day) |                          |                          |
| Q1 (<107.24)               | 1.00                     | 1.00                     |
| Q2 (107.24-<207.21)        | <b>0.89 (0.81, 0.98)</b> | 1.06 (0.87, 1.28)        |
| Q3 (207.21-<352.09)        | 1.04 (0.94, 1.14)        | <b>1.29 (1.06, 1.57)</b> |
| Q4 (352.09+)               | <b>1.20 (1.09, 1.33)</b> | <b>1.59 (1.29, 1.97)</b> |
| <i>P</i> for trend         | <b>&lt;0.001</b>         |                          |

Notes miOR: adjusted odds ratios using multiple imputations; sbOR: adjusted odds ratios with semi-Bayes shrinkage method; SFAs: Saturated fatty acids; MUFAs: Monounsaturated fatty acids; PUFAs: Polyunsaturated fatty acids; n-6 PUFAs: including LA and AA; LA: Linoleic acid; AA: Arachidonic acid; n-3 PUFAs: including ALA, EPA and DHA; ALA:  $\alpha$ -linolenic acid; EPA: Eicosapentaenoic acid; DHA: Docosahexaenoic acid.

a: Adjusted for study area, age (continuous), gender (male/female), education level (illiterate, primary school, middle school, high school or above), income 10 years ago (<1000, 1000-1499, 1500-2499,  $\geq$ 2500), smoking (continuous, pack-years), drinking (continuous, g ethanol/day), family history of stomach cancer (yes/no), *H. pylori* infection (positive/negative), BMI (<18.5, 18.5-24, 24-28,  $\geq$ 28), exercise 10 years ago (yes/no), dietary sodium intake (quartile) and total energy intake (continuous, Kcal/day).

**Supplemental Figure 1.** The study flowchart showing sample size.

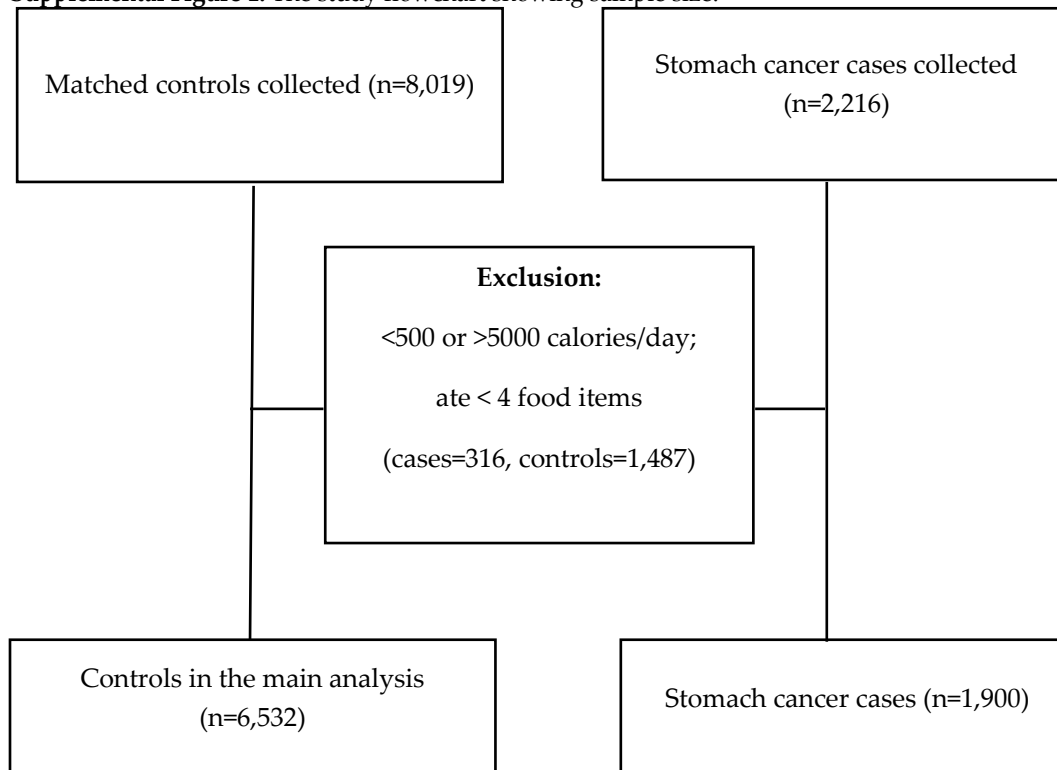

Supplement: nutrients-11-01730-s001.pdf [file nutrients-11-01730-s001.pdf]
